# Supplementary material for: scSemiGCN: boosting cell-type annotation from noise-resistant graph neural networks with extremely limited supervision
Source: PubMed Central journal article supplement (PMC10904148; doi:10.1093/bioinformatics/btae091), 2024-02-16
Supplement: btae091_supplementary_data.pdf [file btae091_supplementary_data.pdf]

Supplementary materials of “scSemiGCN: boosting cell-type annotation from noise-resistant graph neural networks with extremely limited supervision”

Jue Yang<sup>1</sup>, Weiwen Wang<sup>2\*</sup>, Xiwen Zhang<sup>3</sup>

<sup>1</sup>School of Mathematics, Sun Yat-sen University, Guangzhou, China

<sup>2</sup>Department of Mathematics, School of Information Science and Technology, Jinan University, Guangzhou, China

<sup>3</sup>College of Medical Information Engineering, Guangdong Pharmaceutical University, Guangzhou, China

\* To whom correspondence should be addressed.

Email: wangww29@jnu.edu.cn.

Table S1: **The number of annotated cells for each cell type in six datasets for training.**

|         | Buettner | Kolodziejczyk | Pollen | Usoskin | Zeisel | Cortex |
|---------|----------|---------------|--------|---------|--------|--------|
| Type-1  | 3        | 15            | 1      | 7       | 15     | 11     |
| Type-2  | 3        | 8             | 1      | 8       | 19     | 12     |
| Type-3  | 3        | 12            | 1      | 4       | 47     | 14     |
| Type-4  | -        | -             | 1      | 12      | 41     | 5      |
| Type-5  | -        | -             | 1      | -       | 5      | 41     |
| Type-6  | -        | -             | 1      | -       | 9      | 47     |
| Type-7  | -        | -             | 1      | -       | 10     | 20     |
| Type-8  | -        | -             | 2      | -       | 2      | -      |
| Type-9  | -        | -             | 2      | -       | 3      | -      |
| Type-10 | -        | -             | 1      | -       | -      | -      |
| Type-11 | -        | -             | 1      | -       | -      | -      |

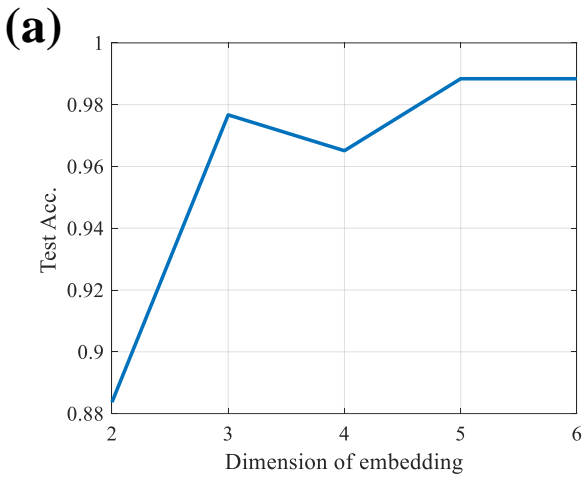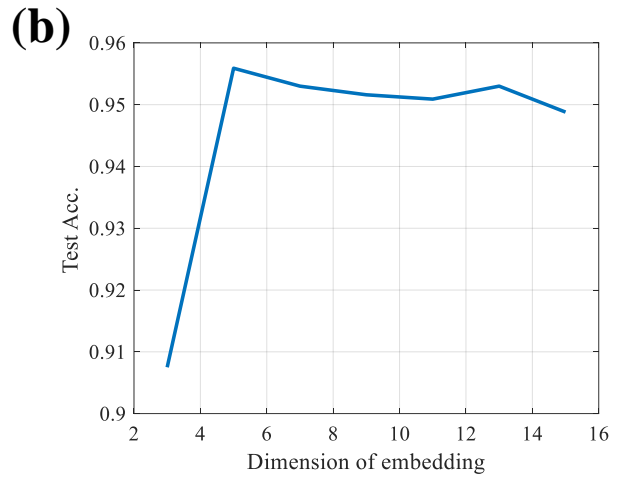

Fig. S1: **Effects of dimension of embeddings  $d$  in SIMLR on scSemiGCN.** (a) Buettner; (b) Cortex.

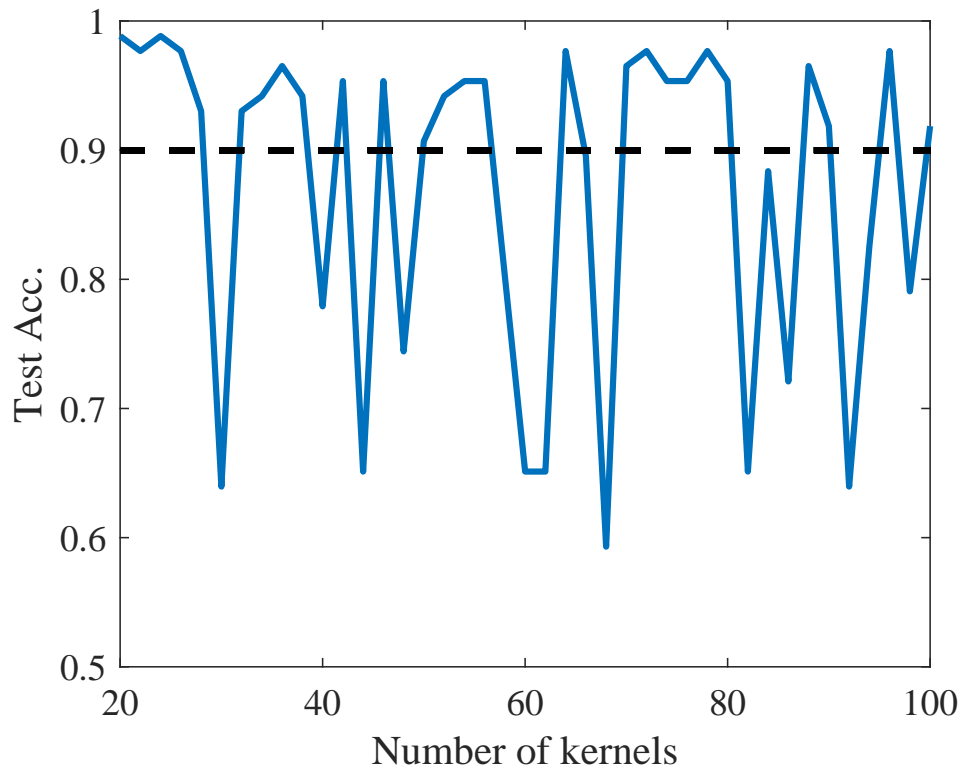

Fig. S2: **Effects of number of kernels used in SIMLR on scSemiGCN.** We take Buettner as an example. As the number of kernels varies, the accuracy oscillates. But we also see that an appropriate number of kernels can be chosen in a wide range.

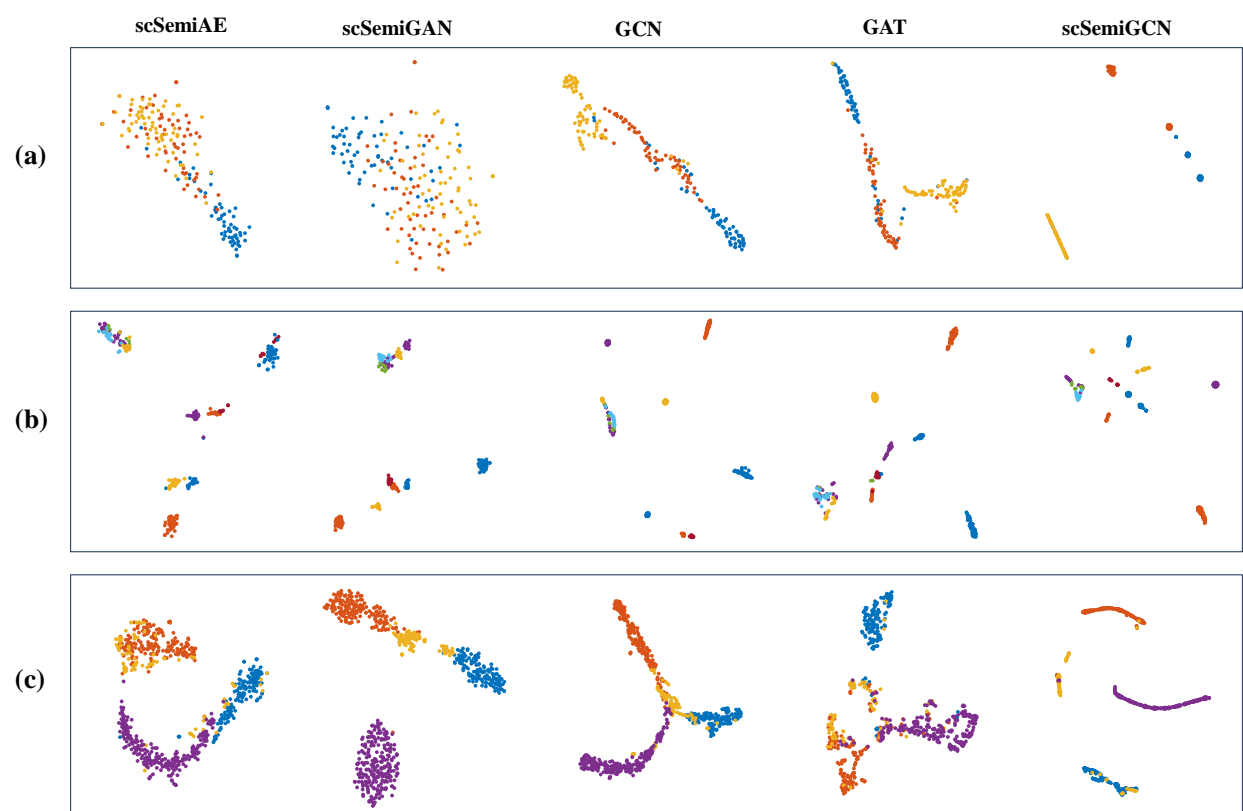

Fig. S3: **Visualization of latent representations generated by neural-network-based methods.** Cell types are indicated by colors. (a)Buettner;(b)Pollen; (c)Usoskin.

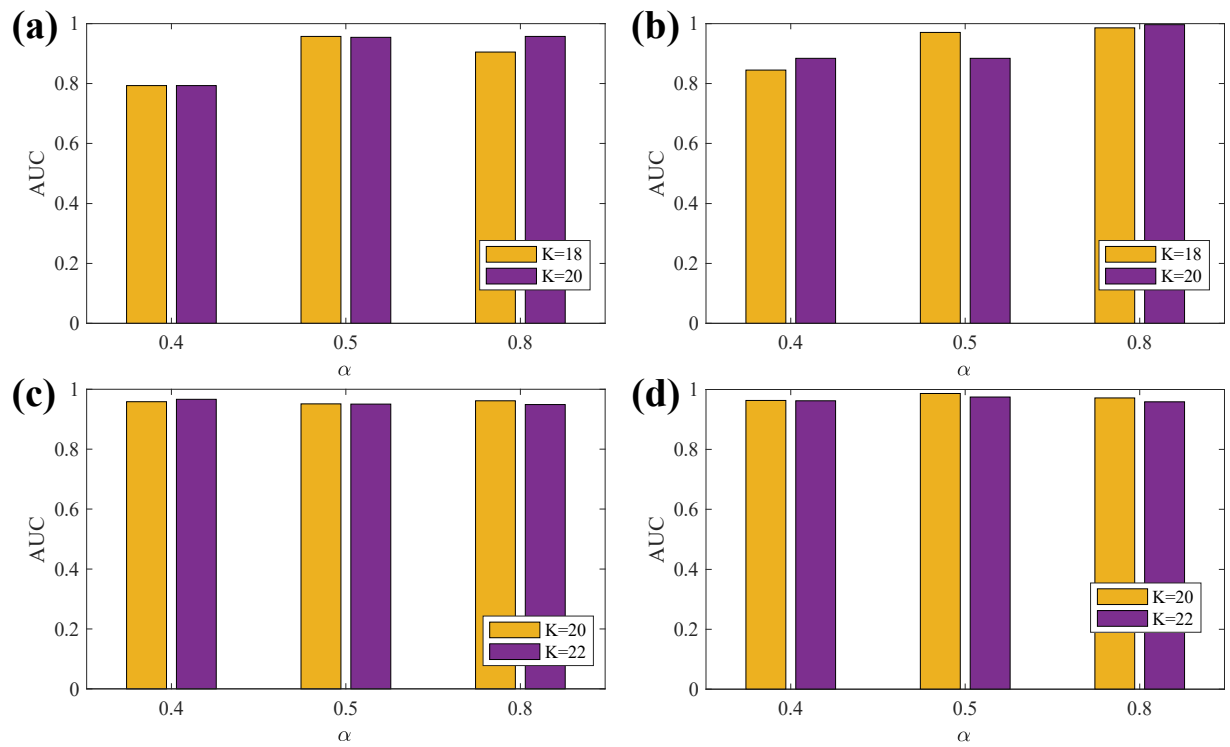

Fig. S4: AUC of validation data under different settings of hyperparameters. (a)Buettner; (b)Pollen; (c)Usoskin; (d)Cortex.

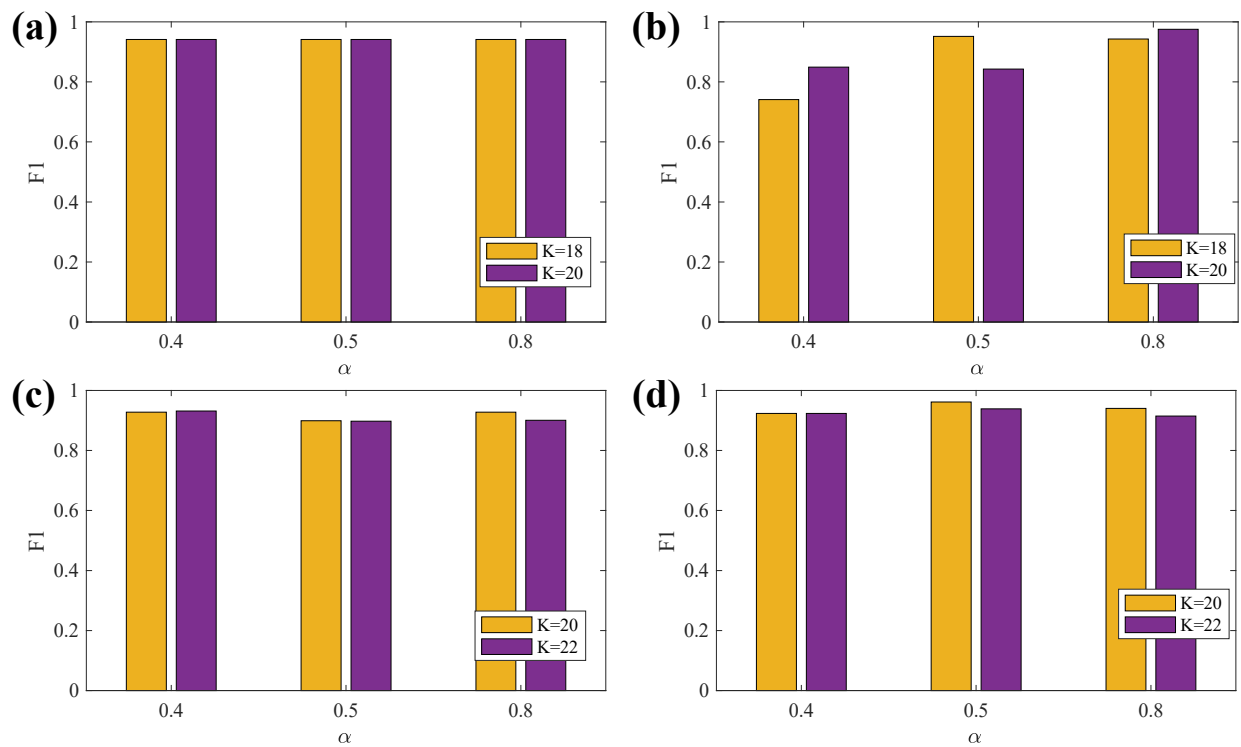

Fig. S5: F1-score of validation data under different settings of hyperparameters. (a)Buettner; (b)Pollen; (c)Usoskin; (d)Cortex.

Table S2: **The number of annotated cells for each cell type in TICA-3C for training.**

| Cell type                               | Number of cells |
|-----------------------------------------|-----------------|
| Transitional memory CD4 T cells         | 7               |
| Mast cells                              | 4               |
| M2 TAMs                                 | 6               |
| T helper cells                          | 8               |
| Naive-memory CD4 T cells                | 14              |
| Pre-exhausted CD8 T cells               | 17              |
| pDC                                     | 7               |
| Recently activated CD4 T cells          | 17              |
| SPP1 TAMs                               | 3               |
| mDC                                     | 6               |
| Cytotoxic CD8 T cells                   | 9               |
| Monocytes                               | 5               |
| Proinflammatory TAMs                    | 4               |
| Plasma B cells                          | 4               |
| Naive T cells                           | 10              |
| Effector memory CD8 T cells             | 16              |
| Proliferative B cells                   | 4               |
| Proliferative T cells                   | 12              |
| NK                                      | 9               |
| Terminally exhausted CD8 T cells        | 9               |
| B cells                                 | 6               |
| Proliferative monocytes and macrophages | 4               |
| Th17 cells                              | 12              |
| Regulatory T cells                      | 12              |
| cDC                                     | 6               |

Table S3: **Accuracy of test data in TICA-3C.**

|     | SIMLR  | GCN    | GAT    | scSemiAE | scSemiGAN | scSemiGCN |
|-----|--------|--------|--------|----------|-----------|-----------|
| ACC | 0.3739 | 0.3751 | 0.3429 | 0.3721   | 0.3764    | 0.4432    |





## Supplementary Notes

### Practical usage of scSemiGCN

Semi-supervised cell-type annotation methods including scSemiGCN require a small subset of annotated cells. There are several ways to obtain such gold-standard annotated cells for semi-supervised cell-type annotation. A few as options are listed below.

- First group cells by classic clustering methods and then identify cell types of representatives of each group based on expression of marker genes.
- Project all unannotated cells onto well-labeled reference data (e.g by Seurat (Stuart *et al.*, 2021)) and select unannotated data cells with high confidence in prediction as landmarks.
- Combine representatives from well-labeled reference data (e.g Human Cell Atlas<sup>1</sup>) with unannotated cells.
- Utilize accumulative annotated cells.

### References

Stuart, T. et al. (2019) Comprehensive integration of single-cell data. *Cell*, **177**, 1888–1902.

---

<sup>1</sup><https://www.humancellatlas.org>
